# Supplementary material for: Embracing heterogeneity: coalescing the Tree of Life and the future of phylogenomics
Source: PeerJ. 2019 Feb 14;7:e6399. doi: 10.7717/peerj.6399 (PMC6378093; doi:10.7717/peerj.6399)
Supplement: Supplemental Information 1 — Each row represents a data set included in Fig. 2. For further details on how this table was built, please see section “Compilation of data in Table S1” in the Supplementary Material. [file peerj-07-6399-s001.xlsx]

## Sheet: Sheet1
Input person	E-mail contact	Taxon	Number samples	Number species	Number loci	Alignment length (bp or aa)	Character	Year	Citation
Bravo et al.	gustavo_bravo@fas.harvard.edu	Lice	15	15	1101	3080000	bp	2016	Allen, J. M. et al. Phylogenomics from Whole Genome Sequences Using aTRAM. Systematic Biology 66, 786-798, doi:10.1093/sysbio/syw105 (2017).
Bravo et al.	gustavo_bravo@fas.harvard.edu	Nemertea	20	20	2779	411138	aa	2014	Andrade, S. C. S. et al. A Transcriptomic Approach to Ribbon Worm Systematics (Nemertea): Resolving the Pilidiophora Problem. Molecular Biology and Evolution 31, 3206-3215, (2014).
Bravo et al.	gustavo_bravo@fas.harvard.edu	Annelida	41	41	1473	336937	aa	2015	Andrade, S. C. S. et al. Articulating "Archiannelids": Phylogenomics and Annelid Relationships, with Emphasis on Meiofaunal Taxa. Molecular Biology and Evolution 32, 2860-2875, (2015).
Bravo et al.	gustavo_bravo@fas.harvard.edu	Fungi (Oomycetes)	17	17	277	249830	bp	2017	Ascunce, M. S., J. C. Huguet-Tapia, A. Ortiz-Urquiza, N. O. Keyhani, E. L. Braun, and E. M. Goss. 2017. Phylogenomic analysis supports multiple instances of polyphyly in the oomycete peronosporalean lineage. Molecular Phylogenetics and Evolution 114:199-211.
Bravo et al.	gustavo_bravo@fas.harvard.edu	Vespid Wasps	37	37	3251	1004596	aa	2017	Bank, S., M. Sann, C. Mayer, K. Meusemann, A. Donath, L. Podsiadlowski, A. Kozlov et al. 2017. Transcriptome and target DNA enrichment sequence data provide new insights into the phylogeny of vespid wasps (Hymenoptera: Aculeata: Vespidae). Molecular Phylogenetics and Evolution 116:213-226.
Bravo et al.	gustavo_bravo@fas.harvard.edu	Acropyga Ants	41	23	944	733400	bp	2016	Blaimer, B. B., J. S. LaPolla, M. G. Branstetter, M. W. Lloyd, and S. G. Brady. 2016. Phylogenomics, biogeography and diversification of obligate mealybug-tending ants in the genus Acropyga. Molecular Phylogenetics and Evolution 102:20-29.
Bravo et al.	gustavo_bravo@fas.harvard.edu	Reptiles	28	28	3320	522592	bp	2017	Blom, M. P. K., Bragg, J. G., Potter, S., & Moritz, C. (2017). Accounting for Uncertainty in Gene Tree Estimation: Summary-Coalescent Species Tree Inference in a Challenging Radiation of Australian Lizards. Systematic Biology, 66(3), 352–366. http://doi.org/10.1093/sysbio/syw089
Bravo et al.	gustavo_bravo@fas.harvard.edu	Ecdysozoa	63	63	189	24249	aa	2014	Borner, J., Rehm, P., Schill, R. O., Ebersberger, I. & Burmester, T. A transcriptome approach to ecdysozoan phylogeny. Molecular Phylogenetics and Evolution 80, 79-87, (2014).
Bravo et al.	gustavo_bravo@fas.harvard.edu	Lice	61	61	977	1596995	bp	2017	Boyd, B. M. et al. Phylogenomics using Target-Restricted Assembly Resolves Intrageneric Relationships of Parasitic Lice (Phthiraptera: Columbicola). Systematic Biology 66, 896-911, doi:10.1093/sysbio/syx027 (2017).
Bravo et al.	gustavo_bravo@fas.harvard.edu	Reptiles	43	27	415	221792	bp	2015	Brandley M.C., Bragg J.G., Singhal S., Chapple D.G., Jennings C.K., Lemmon A.R., Lemmon E.M., Thompson M.B., Moritz C. 2015. Evaluating the performance of anchored hybrid enrichment at the tips of the tree of life: a phylogenetic analysis of Australian Eugongylus group scincid lizards. BMC Evol. Biol. 15:62. DOI 10.1186/s12862-015-0318-0
Bravo et al.	gustavo_bravo@fas.harvard.edu	Hymenoptera	187	187	854	203095	bp	2017	Branstetter BG, BN Danforth, JP Pitts, BC Faircloth, PS Ward, ML Buffington, MW Gates, RR Kula, SG Brady (2017). Phylogenomic analysis of ants, bees and stinging wasps: improved taxon sampling enhances understanding of hymenopteran evolution. Curr Biol 27:1019-1025. doi: 10.1016/j.cub.2017.03.027
Bravo et al.	gustavo_bravo@fas.harvard.edu	Ants	118	118	950	652774	bp	2017	Branstetter, M. G., A. Ješovnik, J. Sosa-Calvo, M. W. Lloyd, B. C. Faircloth, S. G. Brady, and T. R. Schultz. 2017. Dry habitats were crucibles of domestication in the evolution of agriculture in ants. Proceedings of the Royal Society B: Biological Sciences 284.
Bravo et al.	gustavo_bravo@fas.harvard.edu	Flagellates	68	68	159	43615	aa	2013	Brown, M. W., S. C. Sharpe, J. D. Silberman, A. A. Heiss, B. F. Lang, A. G. B. Simpson, and A. J. Roger. 2013. Phylogenomics demonstrates that breviate flagellates are related to opisthokonts and apusomonads. Proceedings of the Royal Society B: Biological Sciences 280.
Bravo et al.	gustavo_bravo@fas.harvard.edu	Eukaryotes	150	150	250	55554	aa	2016	Burki, F., M. Kaplan, D. V. Tikhonenkov, V. Zlatogursky, B. Q. Minh, L. V. Radaykina, A. Smirnov et al. 2016. Untangling the early diversification of eukaryotes: a phylogenomic study of the evolutionary origins of Centrohelida, Haptophyta and Cryptista. Proceedings of the Royal Society B: Biological Sciences 283.
Bravo et al.	gustavo_bravo@fas.harvard.edu	Haptophytes And Cryptophytes	68	68	258	55881	aa	2012	Burki, F., N. Okamoto, J.-F. Pombert, and P. J. Keeling. 2012. The evolutionary history of haptophytes and cryptophytes: phylogenomic evidence for separate origins. Proceedings of the Royal Society B: Biological Sciences 279:2246.
Bravo et al.	gustavo_bravo@fas.harvard.edu	Plants	136	136	18896	2900000	bp	2010	Burleigh, J. G. et al. Genome-Scale Phylogenetics: Inferring the Plant Tree of Life from 18,896 Gene Trees. Systematic Biology 60, 117-125, doi:10.1093/sysbio/syq072 (2011).
Bravo et al.	gustavo_bravo@fas.harvard.edu	Amoebozoa	109	109	188	51352	aa	2015	Cavalier-Smith, T. et al. Multigene phylogeny resolves deep branching of Amoebozoa. Molecular Phylogenetics and Evolution 83, 293-304, (2015).
Bravo et al.	gustavo_bravo@fas.harvard.edu	Ratsnakes	88	88	304	452698	bp	2017	Chen, X., A. R. Lemmon, E. M. Lemmon, R. A. Pyron, and F. T. Burbrink. 2017. Using phylogenomics to understand the link between biogeographic origins and regional diversification in ratsnakes. Molecular Phylogenetics and Evolution 111:206-218.
Bravo et al.	gustavo_bravo@fas.harvard.edu	Plants	34	34	168	165444	bp	2016	Comer, J. R., Zomlefer, W. B., Barrett, C. F., Stevenson, D. Wm., Heyduk, K., Leebens-Mack, J. H. 2016. Nuclear phylogeonomics of the palm subfamily Arecoideae (Arecaceae). Mol. Phylogenet. Evol. 97: 32-42.
Bravo et al.	gustavo_bravo@fas.harvard.edu	Plants	5	5	4436	NA	bp	2017	Copetti, D., Burquez, A., Bustamante, E., Charboneau, J. L. M., Childs, K. L. Equiarte, L. E., Lee, S., Liu, T. L. McMahon, M . M. Whiteman, N. K. ,Wing, R. A., Wojciechowski, M. F., Sanderson, M. J. 2017. Extensive gene tree discordance and hemiplasy shaped the genomes of North American columnar cacti. Proc. Natl. Acad. Sci. USA 114: 12003-12008.
Bravo et al.	gustavo_bravo@fas.harvard.edu	Rice	6	6	307	136684	bp	2009	Cranston, K. A., B. Hurwitz, D. Ware, L. Stein, and R. A. Wing. 2009. Species Trees from Highly Incongruent Gene Trees in Rice. Systematic Biology 58:489-500.
Bravo et al.	gustavo_bravo@fas.harvard.edu	Vertebrates	10	10	1145	464870	bp	2012	Crawford, N. G., B. C. Faircloth, J. E. McCormack, R. T. Brumfield, K. Winker, and T. C. Glenn. 2012. More than 1000 ultraconserved elements provide evidence that turtles are the sister group of archosaurs. Biol Lett 8:783-786.
Bravo et al.	gustavo_bravo@fas.harvard.edu	Lagonosticta And Vidua	15	15	3100	276476	bp	2016	DaCosta, J. M. & Sorenson, M. D. ddRAD-seq phylogenetics based on nucleotide, indel, and presence-absence polymorphisms: Analyses of two avian genera with contrasting histories. Molecular Phylogenetics and Evolution 94, 122-135, (2016).
Bravo et al.	gustavo_bravo@fas.harvard.edu	Metazoa	38	38	146	33800	aa	2006	Delsuc, F., H. Brinkmann, D. Chourrout, and H. Philippe. 2006. Tunicates and not cephalochordates are the closest living relatives of vertebrates. Nature 439:965-968.
Bravo et al.	gustavo_bravo@fas.harvard.edu	Photosynthetic Eukaryotes	23	23	124	28603	aa	2009	Deschamps, P. & Moreira, D. Signal Conflicts in the Phylogeny of the Primary Photosynthetic Eukaryotes. Molecular Biology and Evolution 26, 2745-2753
Bravo et al.	gustavo_bravo@fas.harvard.edu	Bacteria(Pasteurellaceae)	14	14	3130	1194615	aa	2010	Di Bonaventura, M. P., Lee, E. K., DeSalle, R. & Planet, P. J. A whole-genome phylogeny of the family Pasteurellaceae. Molecular Phylogenetics and Evolution 54, 950-956
Bravo et al.	gustavo_bravo@fas.harvard.edu	Sister To Percomorph Fishes	15	15	132	99948	bp	2017	Dornburg, A., J. P. Townsend, W. Brooks, E. Spriggs, R. I. Eytan, J. A. Moore, P. C. Wainwright et al. 2017. New insights on the sister lineage of percomorph fishes with an anchored hybrid enrichment dataset. Molecular Phylogenetics and Evolution 110:27-38.
Bravo et al.	gustavo_bravo@fas.harvard.edu	Marsupials	18	18	1550	867000	bp	2017	Duchêne DA, Bragg JG, Duchêne S, Neaves LE, Potter S, Moritz C, Johnson RN, Ho SYW, Eldridge MDB. Analysis of Phylogenomic Tree Space Resolves Relationships Among Marsupial Families. Syst Biol. 2017 Sep 22. doi: 10.1093/sysbio/syx076.
Bravo et al.	gustavo_bravo@fas.harvard.edu	Metazoa	77	77	150	NA	bp	2008	Dunn, C. W., A. Hejnol, D. Q. Matus, K. Pang, W. E. Browne, S. A. Smith, E. Seaver et al. 2008. Broad phylogenomic sampling improves resolution of the animal tree of life. Nature 452:745-U745.
Bravo et al.	gustavo_bravo@fas.harvard.edu	Fungi	57	57	121	33199	bp	2012	Ebersberger, I., R. D. Simoes, A. Kupczok, M. Gube, E. Kothe, K. Voigt, and A. von Haeseler. 2012. A Consistent Phylogenetic Backbone for the Fungi. Molecular Biology and Evolution 29:1319-1334.
Bravo et al.	gustavo_bravo@fas.harvard.edu	Teleosts (Bay Gobies)	41	41	284	5048	bp	2014	Ellingson, R. A., Swift, C. C., Findley, L. T. & Jacobs, D. K. Convergent evolution of ecomorphological adaptations in geographically isolated Bay gobies (Teleostei: Gobionellidae) of the temperate North Pacific. Molecular Phylogenetics and Evolution
Bravo et al.	gustavo_bravo@fas.harvard.edu	Plants	53	25	8	NA	bp	2017	Eriksson, J.S., Blanco Pastor, J.L., Sousa, F., Bertrand, Y.J.K. and Pfeil, B.E. (2017). A cryptic species produced by autopolyploidy and subsequent introgression involving Medicago prostrata (Fabaceae). Molecular Phylogenetics and Evolution. 107:367-381. http://dx.doi.org/10.1016/j.ympev.2016.11.020
Bravo et al.	gustavo_bravo@fas.harvard.edu	Fish	29	29	254	82782	bp	2015	Eytan RI, Evans BR, Dornburg A, Lemmon AR, Lemmon EM, Wainwright PC, et al. Are 100 enough? Inferring acanthomorph teleost phylogeny using Anchored Hybrid Enrichment. BMC Evol Biol. 2015;15:113.
Bravo et al.	gustavo_bravo@fas.harvard.edu	Arthropods	30	29	721	728210	bp	2015	Faircloth B.C. et al. (2015) Target enrichment of ultraconserved elements from arthropods provides a genomic perspective on relationships among Hymenoptera. Mol. Ecol. Resour. 15, 489–501.
Bravo et al.	gustavo_bravo@fas.harvard.edu	Fish	18	18	491	149366	bp	2013	Faircloth BC, L Sorenson, F Santini, ME Alfaro (2013) A Phylogenomic Perspective on the radiation of ray-finned fishes based upon targeted sequencing of ultraconserved elements (UCEs). PLoS ONE 8(6): e65923. doi:10.1371/journal.pone.0065923
Bravo et al.	gustavo_bravo@fas.harvard.edu	Birds	9	9	854	351848	bp	2012	Faircloth, B. C. et al. Ultraconserved Elements Anchor Thousands of Genetic Markers Spanning Multiple Evolutionary Timescales. Systematic Biology 61, 717-726, doi:10.1093/sysbio/sys004 (2012).
Bravo et al.	gustavo_bravo@fas.harvard.edu	Primates	9	9	2030	876960	bp	2012	Faircloth, B. C. et al. Ultraconserved Elements Anchor Thousands of Genetic Markers Spanning Multiple Evolutionary Timescales. Systematic Biology 61, 717-726, doi:10.1093/sysbio/sys004 (2012).
Bravo et al.	gustavo_bravo@fas.harvard.edu	Mammals	47	47	95	214822	bp	2017	Feijoo, M., and A. Parada. 2017. Macrosystematics of eutherian mammals combining HTS data to expand taxon coverage. Molecular Phylogenetics and Evolution 113:76-83.
Bravo et al.	gustavo_bravo@fas.harvard.edu	Ciliate (Oligohymenophorea)	26	26	113	43528	aa	2015	Feng, J. M. et al. Phylogenomic analyses reveal subclass Scuticociliatia as the sister group of subclass Hymenostomatia within class Oligohymenophorea. Molecular Phylogenetics and Evolution 90, 104-111, (2015).
Bravo et al.	gustavo_bravo@fas.harvard.edu	Frogs	164	164	95	88302	bp	2017	Feng, Y. J., D. C. Blackburn, D. Liang, D. M. Hillis, D. B. Wake, D. C. Cannatella, and P. Zhang. 2017. Phylogenomics reveals rapid, simultaneous diversification of three major clades of Gondwanan frogs at the Cretaceous-Paleogene boundary. Proc Natl Acad Sci U S A 114:E5864-E5870.
Bravo et al.	gustavo_bravo@fas.harvard.edu	Opiliones	67	67	78	13239	bp	2017	Fernández, R., P. P. Sharma, A. L. Tourinho, and G. Giribet. 2017. The Opiliones tree of life: shedding light on harvestmen relationships through transcriptomics. Proceedings of the Royal Society B: Biological Sciences 284.
Bravo et al.	gustavo_bravo@fas.harvard.edu	Grasses	47	47	122	105486	bp	2016	Fisher, A. E., K. M. Hasenstab, H. L. Bell, E. Blaine, A. L. Ingram, and J. T. Columbus. 2016. Evolutionary history of chloridoid grasses estimated from 122 nuclear loci. Molecular Phylogenetics and Evolution 105:1-14.
Bravo et al.	gustavo_bravo@fas.harvard.edu	Plants	70	70	277	404475	bp	2017	Folk, R. A., Mandel, J. R. & Freudenstein, J. V. Ancestral Gene Flow and Parallel Organellar Genome Capture Result in Extreme Phylogenomic Discord in a Lineage of Angiosperms. Systematic Biology 66, 320-337, doi:10.1093/sysbio/syw083 (2017).
Bravo et al.	gustavo_bravo@fas.harvard.edu	Spiders	74	74	3398	696652	aa	2016	Garrison, N, J Rodriguez, I Agnarsson, JA Coddington, CE Griswold, CA Hamilton, M Hedin, KM Kocot, JM Ledford, JE Bond. 2016. Spider phylogenomics: untangling the Spider Tree of Life. PeerJ Feb 23;4:e1719
Bravo et al.	gustavo_bravo@fas.harvard.edu	Ciliophora	11	11	158	42158	aa	2014	Gentekaki, E. et al. Large-scale phylogenomic analysis reveals the phylogenetic position of the problematic taxon Protocruzia and unravels the deep phylogenetic affinities of the ciliate lineages
Bravo et al.	gustavo_bravo@fas.harvard.edu	Ciliates	24	24	158	44696	aa	2017	Gentekaki, E., M. Kolisko, Y. C. Gong, and D. Lynn. 2017. Phylogenomics solves a long-standing evolutionary puzzle in the ciliate world: The subclass Peritrichia is monophyletic. Molecular Phylogenetics and Evolution 106:1-5.
Bravo et al.	gustavo_bravo@fas.harvard.edu	Shrews	19	7	1112	737256	bp	2015	Giarla, T. C., and J. A. Esselstyn. 2015. The Challenges of Resolving a Rapid, Recent Radiation: Empirical and Simulated Phylogenomics of Philippine Shrews. Systematic Biology 64:727-740.
Bravo et al.	gustavo_bravo@fas.harvard.edu	Percomorph Fishes	8	8	988	192660	bp	2015	Gilbert, P. S. et al. Genome-wide ultraconserved elements exhibit higher phylogenetic informativeness than traditional gene markers in percomorph fishes. Molecular Phylogenetics and Evolution 92, 140-146, (2015).
Bravo et al.	gustavo_bravo@fas.harvard.edu	Bivalves	40	40	729	117190	aa	2015	González, V. L., S. C. S. Andrade, R. Bieler, T. M. Collins, C. W. Dunn, P. M. Mikkelsen, J. D. Taylor et al. 2015. A phylogenetic backbone for Bivalvia: an RNA-seq approach. Proceedings of the Royal Society B: Biological Sciences 282.
Bravo et al.	gustavo_bravo@fas.harvard.edu	Mammals	16	11	NA	17200000	bp	2012	Groenen, M.A.M., Megens, H.J.W.C., Frantz, L.A.F. et al (2012), Analyses of pig genomes provide insight to porcine demography and evolution, Nature 491 . - p. 393 - 398.
Bravo et al.	gustavo_bravo@fas.harvard.edu	Mammals	31	31	3364	2863797	bp	2010	Hallstrom, B. M. & Janke, A. Mammalian Evolution May not Be Strictly Bifurcating. Molecular Biology and Evolution 27, 2804-2816, (2010)
Bravo et al.	gustavo_bravo@fas.harvard.edu	Gnathostomes	12	12	78	21749	aa	2009	Hallstrom, B. M. and Janke, A. 2009. Gnathostome phylogenomics utilizing lungfish EST sequences. Molecular Biology and Evolution 26:463-471.
Bravo et al.	gustavo_bravo@fas.harvard.edu	Mammals	13	13	2840	2168859	bp	2007	Hallstrom, B. M., M. Kullberg, M. A. Nilsson, and A. Janke. 2007. Phylogenomic data analyses provide evidence that Xenarthra and Afrotheria are sister groups. Molecular Biology and Evolution 24:2059-2068.
Bravo et al.	gustavo_bravo@fas.harvard.edu	Lophophorata	62	62	78	11544	aa	2010	Hausdorf, B., Helmkampf, M., Nesnidal, M. P. & Bruchhaus, I. Phylogenetic relationships within the lophophorate lineages (Ectoprocta, Brachiopoda and Phoronida). Molecular Phylogenetics and Evolution 55, 1121-1127, (2010).
Bravo et al.	gustavo_bravo@fas.harvard.edu	Spiralia	38	38	79	11428	aa	2007	Hausdorf, B., M. Helmkampf, A. Meyer, A. Witek, H. Herlyn, I. Bruchhaus, T. Hankeln et al. 2007. Spiralian phylogenomics supports the resurrection of Bryozoa comprising Ectoprocta and Entoprocta. Molecular Biology and Evolution 24:2723-2729.
Bravo et al.	gustavo_bravo@fas.harvard.edu	Rhizaria	44	44	147	NA	aa	2016	He, D., R. Sierra, J. Pawlowski, and S. L. Baldauf. 2016. Reducing long-branch effects in multi-protein data uncovers a close relationship between Alveolata and Rhizaria. Molecular Phylogenetics and Evolution 101:1-7.
Bravo et al.	gustavo_bravo@fas.harvard.edu	Metazoa	94	94	1487	270580	aa	2009	Hejnol, A., M. Obst, A. Stamatakis, M. Ott, G. W. Rouse, G. D. Edgecombe, P. Martinez et al. 2009. Assessing the root of bilaterian animals with scalable phylogenomic methods. Proc Biol Sci 276:4261-4270.
Bravo et al.	gustavo_bravo@fas.harvard.edu	Cnidarians	44	44	5997	528383	bp	2016	Herrera, S., and T. M. Shank. 2016. RAD sequencing enables unprecedented phylogenetic resolution and objective species delimitation in recalcitrant divergent taxa. Molecular Phylogenetics and Evolution 100:70-79.
Bravo et al.	gustavo_bravo@fas.harvard.edu	Octocorallia (Cnidaria)	44	12	5997	85293	bp	2016	Herrera, S., Shank, T. M. 2016. RAD sequencing enables unprecedented phylogenetic resolution and objective species delimitation in recalcitrant divergent taxa. Molecular Phylogenetics and Evolution 100:70-79.
Bravo et al.	gustavo_bravo@fas.harvard.edu	Yucca/Agave	60	60	272	123651	bp	2016	Heyduk, K., M. R. McKain, F. Lalani, and J. Leebens-Mack. 2016. Evolution of a CAM anatomy predates the origins of Crassulacean acid metabolism in the Agavoideae (Asparagaceae). Molecular Phylogenetics and Evolution 105:102-113.
Bravo et al.	gustavo_bravo@fas.harvard.edu	Plants	18	18	133	NA	bp	2016	Heyduk, K., Trapnell, D. W., Barrett, C. F., Leebens-Mack, J. 2016. Phylogeonomic analyses of species relationships in the genus Sabal (Arecaceae) using targeted sequence capture. Biol. J. Linnean Soc. 117: 106-120.
Bravo et al.	gustavo_bravo@fas.harvard.edu	Galliforms	114	114	4021	1668757	bp	2017	Hosner, P. A., J. A. Tobias, E. L. Braun, and R. T. Kimball. 2017. How do seemingly non-vagile clades accomplish trans-marine dispersal? Trait and dispersal evolution in the landfowl (Aves: Galliformes). Proceedings of the Royal Society B: Biological Sciences 284.
Bravo et al.	gustavo_bravo@fas.harvard.edu	Ophiuroidea	52	52	418	275352	bp	2016	Hugall, A. F., O'Hara, T. D., Hunjan, S., Nilsen, R. & Moussalli, A. An Exon-Capture System for the Entire Class Ophiuroidea. Molecular Biology and Evolution 33, 281-294, (2016).
Bravo et al.	gustavo_bravo@fas.harvard.edu	Coleoptera	20	20	66	10403	aa	2006	Hughes, J., S. J. Longhorn, A. Papadopoulou, K. Theodorides, A. de Riva, M. Mejia-Chang, P. G. Foster et al. 2006. Dense taxonomic EST sampling and its applications for molecular systematics of the Coleoptera (beetles). Molecular Biology and Evolution 23:268-278.
Bravo et al.	gustavo_bravo@fas.harvard.edu	Fish	10	10	564	649549	bp	2014	Ilves, K. L., & López-Fernández, H. (2014). A targeted next-generation sequencing toolkit for exon-based cichlid phylogenomics. Molecular Ecology Resources, 14(4), 802–811. http://doi.org/10.1111/1755-0998.12222
Bravo et al.	gustavo_bravo@fas.harvard.edu	Birds	48	48	8251	41800000	bp	2014	Jarvis, E. D. et al. Whole-genome analyses resolve early branches in the tree of life of modern birds. Science 346, 1320-1331, doi:Doi 10.1126/Science.1253451 (2014).
Bravo et al.	gustavo_bravo@fas.harvard.edu	Lice ，Insecta	20	20	10	6135	bp	2013	Johnson, K. P., K. K. O. Walden, and H. M. Robertson. 2013. Next-generation phylogenomics using a Target Restricted Assembly Method. Molecular Phylogenetics and Evolution 66:417-422.
Bravo et al.	gustavo_bravo@fas.harvard.edu	Hypnales, Bryophyta	27	26	659	1062897	bp	2012	Johnson, M. G., Malley, C., Goffinet, B., Shaw, A. J. & Wickett, N. J. A phylotranscriptomic analysis of gene family expansion and evolution in the largest order of pleurocarpous mosses (Hypnales, Bryophyta). Molecular Phylogenetics and Evolution 98, 29-40, (2016).
Bravo et al.	gustavo_bravo@fas.harvard.edu	Birds	18	18	1479	601191	bp	2016	KA Meiklejohn, BC Faircloth, TC Glenn, RT Kimball, EL Braun (2016). Analysis of a rapid evolutionary radiation using ultraconserved elements (UCEs): Evidence for a bias in some multispecies coalescent methods. Syst Biol 65:612-627. doi: 10.1093/sysbio/syw014
Bravo et al.	gustavo_bravo@fas.harvard.edu	Plants	54	20	257	NA	bp	2017	Kamneva, O.K., Syring, J., Liston, A., Rosenberg, N.A. (2017). Evaluating allopolyploid origins in strawberries (Fragaria) using haplotypes generated from target capture sequencing. BMC Evolutionary Biology 17, DOI:10.1186/s12862-017-1019-7.
Bravo et al.	gustavo_bravo@fas.harvard.edu	Lepidoptera	26	26	465	24640	aa	2014	Kawahara, A. Y., and J. W. Breinholt. 2014. Phylogenomics provides strong evidence for relationships of butterflies and moths. Proceedings of the Royal Society B: Biological Sciences 281.
Bravo et al.	gustavo_bravo@fas.harvard.edu	Birds	77	77	50	57500	bp	2013	Kimball, R. T., Wang, N., Heimer-McGinn, V., Ferguson, C. & Braun, E. L. Identifying localized biases in large datasets: A case study using the avian tree of life. Molecular Phylogenetics and Evolution 69, 1021-1032, (2013).
Bravo et al.	gustavo_bravo@fas.harvard.edu	Lophotrochozoa	32	32	638	121980	bp	2017	Kocot, K. M. et al. Phylogenomics of Lophotrochozoa with Consideration of Systematic Error. Systematic Biology 66, 256-282, doi:10.1093/sysbio/syw079 (2017).
Bravo et al.	gustavo_bravo@fas.harvard.edu	Mollusca	19	19	102	18101	aa	2013	Kocot, K. M., Halanych, K. M. & Krug, P. J. Phylogenomics supports Panpulmonata: Opisthobranch paraphyly and key evolutionary steps in a major radiation of gastropod molluscs. Molecular Phylogenetics and Evolution 69, 764-771, (2013).
Bravo et al.	gustavo_bravo@fas.harvard.edu	Birds	120	16	NA	45000000	bp	2015	Lamichhaney S, et al. (2015) Evolution of Darwin’s finches and their beaks revealed by genome sequencing. Nature 518 (7539): 371–375
Bravo et al.	gustavo_bravo@fas.harvard.edu	Birds	226	25	NA	46000000	bp	2017	Lamichhaney S, et al. (2017) Rapid hybrid speciation in Darwin’s finches, Science 10.1126/science.aao4593
Bravo et al.	gustavo_bravo@fas.harvard.edu	Reptiles	23	23	215	71614	bp	2014	Leaché A.D., Wagner P., Linkem C.W., Böhme W., Papenfuss T.J., Chong R.A., Lavin B.R., Bauer A.M., Nielsen S.V., Greenbaum E., Rödel M.O., Schmitz A., LeBreton M., Ineich I., Chirio L., Ofori- Boateng C., Eniang E.A., Baha El Din S., Lemmon A.R., Burbrink F.T. 2014. A hybrid phylogenetic-phylogenomic approach for species tree estimation in African Agama lizards with applications to biogeograph…
Bravo et al.	gustavo_bravo@fas.harvard.edu	Lizards	23	23	215	71614	bp	2014	Leache, A. D. et al. A hybrid phylogenetic-phylogenomic approach for species tree estimation in African Agama lizards with applications to biogeography, character evolution, and diversification. Molecular Phylogenetics and Evolution 79, 215-230,
Bravo et al.	gustavo_bravo@fas.harvard.edu	Sipunculans	18	18	675	149565	aa	2015	Lemer, S. et al. Re-evaluating the phylogeny of Sipuncula through transcriptomics. Molecular Phylogenetics and Evolution 83, 174-183, (2015).
Bravo et al.	gustavo_bravo@fas.harvard.edu	Pteriomorphs	49	49	277	64318	aa	2016	Lemer, S., V. L. González, R. Bieler, and G. Giribet. 2016. Cementing mussels to oysters in the pteriomorphian tree: a phylogenomic approach. Proceedings of the Royal Society B: Biological Sciences 283.
Bravo et al.	gustavo_bravo@fas.harvard.edu	Amniotes	6	6	123	NA	bp	2012	Lemmon, A. R., Emme, S. A. & Lemmon, E. M. Anchored Hybrid Enrichment for Massively High-Throughput Phylogenomics. Systematic Biology 61, 727-744, doi:10.1093/sysbio/sys049 (2012).
Bravo et al.	gustavo_bravo@fas.harvard.edu	Tubeworms	14	14	298	103421	aa	2017	Li Y, Kocot KM, Whelan NV, Santos SR, Waits DS, Thornhill DJ, Halanych KM. 2017. Phylogenomics of tubeworms (Siboglinidae, Annelida) and comparative performance of different reconstruction methods. Zoologica Scripta 46, 200-213.
Bravo et al.	gustavo_bravo@fas.harvard.edu	Fish	10	10	1290	2072514	bp	2013	Liang, D., Shen, X.X., Zhang, P. 2013. One Thousand Two Hundred Ninety Nuclear Genes from a Genome-Wide Survey Support Lungfishes as the Sister Group of Tetrapods. Molecular Biology and Evolution 30:1803-1807.
Bravo et al.	gustavo_bravo@fas.harvard.edu	Tree Shrews (Mammals)	17	17	6845	13000000	bp	2014	Lin, J. N. et al. Phylogenetic affinity of tree shrews to Glires is attributed to fast evolution rate. Molecular Phylogenetics and Evolution 71, 193-200, (2014)
Bravo et al.	gustavo_bravo@fas.harvard.edu	Mammals	90	90	4388	13040111	bp	2017	Liu, L., J. Zhang, F. E. Rheindt, F. Lei, Y. Qu, Y. Wang, Y. Zhang et al. 2017. Genomic evidence reveals a radiation of placental mammals uninterrupted by the KPg boundary. Proceedings of the National Academy of Sciences of the United States of America 114:E7282-E7290.
Bravo et al.	gustavo_bravo@fas.harvard.edu	Fish	112	112	448	149710	bp	2017	Longo, S. J., B. C. Faircloth, A. Meyer, M. W. Westneat, M. E. Alfaro, and P. C. Wainwright. 2017. Phylogenomic analysis of a rapid radiation of misfit fishes (Syngnathiformes) using ultraconserved elements. Molecular Phylogenetics and Evolution 113:33-48.
Bravo et al.	gustavo_bravo@fas.harvard.edu	Vespid Wasps	8	8	3356	2285441	aa	2017	Lopez-Osorio, F., K. M. Pickett, J. M. Carpenter, B. A. Ballif, and I. Agnarsson. 2017. Phylogenomic analysis of yellowjackets and hornets (Hymenoptera: Vespidae, Vespinae). Molecular Phylogenetics and Evolution 107:10-15.
Bravo et al.	gustavo_bravo@fas.harvard.edu	Wasps	8	8	3356	2285441	bp	2017	Lopez-Osorio, F., Pickett, K.M., Carpenter, J.M., Ballif, B.A. and Agnarsson, I. (2017). Phylogenomic analysis of yellowjackets and hornets (Hymenoptera: Vespidae, Vespinae). Molecular Phylogenetics and Evolution. 107:10-15.
Bravo et al.	gustavo_bravo@fas.harvard.edu	Birds	30	15	734	659794	bp	2016	Manthey JD, Campillo LC, Burns KJ, Moyle RG (2016) Comparison of target-capture and restriction-site associated DNA sequencing for phylogenomics: a test in cardinalid tanagers (Aves, genus: Piranga). Systematic Biology 65(4): 640-650. https://doi.org/10.1093/sysbio/syw005
Bravo et al.	gustavo_bravo@fas.harvard.edu	Zebrafish	23	23	30801	483026	aa	2015	McCluskey, B. M. & Postlethwait, J. H. Phylogeny of Zebrafish, a "Model Species," within Danio, a "Model Genus". Molecular Biology and Evolution 32, 635-652, (2015).
Bravo et al.	gustavo_bravo@fas.harvard.edu	Mammals	29	29	183	94607	bp	2012	McCormack, J. E., B. C. Faircloth, N. G. Crawford, P. A. Gowaty, R. T. Brumfield, and T. C. Glenn. 2012. Ultraconserved elements are novel phylogenomic markers that resolve placental mammal phylogeny when combined with species-tree analysis. Genome Res 22:746-754.
Bravo et al.	gustavo_bravo@fas.harvard.edu	Mammals	19	19	917	908702	bp	2012	McCormack, J. E., B. C. Faircloth, N. G. Crawford, P. A. Gowaty, R. T. Brumfield, and T. C. Glenn. 2012. Ultraconserved elements are novel phylogenomic markers that resolve placental mammal phylogeny when combined with species-tree analysis. Genome Res 22:746-754.
Bravo et al.	gustavo_bravo@fas.harvard.edu	Birds	32	32	1541	539350	bp	2013	McCormack, J. E., M. G. Harvey, B. C. Faircloth, N. G. Crawford, T. C. Glenn, and R. T. Brumfield. 2013. A phylogeny of birds based on over 1,500 loci collected by target enrichment and high-throughput sequencing. PLoS One 8:e54848.
Bravo et al.	gustavo_bravo@fas.harvard.edu	Arthropod	233	233	775	350356	bp	2010	Meusemann, K. et al. A Phylogenomic Approach to Resolve the Arthropod Tree of Life. Molecular Biology and Evolution 27, 2451-2464, (2010)
Bravo et al.	gustavo_bravo@fas.harvard.edu	Amoebae	37	37	78	17283	aa	2009	Minge, A., M., J. D. Silberman, R. J. S. Orr, T. Cavalier-Smith, K. Shalchian-Tabrizi, F. Burki, Å. Skjæveland et al. 2009. Evolutionary position of breviate amoebae and the primary eukaryote divergence. Proceedings of the Royal Society B: Biological Sciences 276:597.
Bravo et al.	gustavo_bravo@fas.harvard.edu	Insects	144	144	1478	1240377	bp	2014	Misof, B., S. Liu, K. Meusemann, R. S. Peters, A. Donath, C. Mayer, P. B. Frandsen et al. 2014. Phylogenomics resolves the timing and pattern of insect evolution. Science 346:763-767.
Bravo et al.	gustavo_bravo@fas.harvard.edu	Birds	79	4	18649	186490	bp	2015	Nater, A., Burri, R., Kawakami, T., Smeds, L. & Ellegren, H. Resolving Evolutionary Relationships in Closely Related Species with Whole-Genome Sequencing Data. Systematic Biology 64, 1000-1017, doi:10.1093/sysbio/syv045 (2015).
Bravo et al.	gustavo_bravo@fas.harvard.edu	Fish	6	6	NA	110117	bp	2010	Negrisolo, E. et al. Different Phylogenomic Approaches to Resolve the Evolutionary Relationships among Model Fish Species. Molecular Biology and Evolution 27, 2757-2774, (2010)
Bravo et al.	gustavo_bravo@fas.harvard.edu	Mammals	11	11	3733	5154748	bp	2012	Nery, M. F., D. J. Gonzalez, F. G. Hoffmann, and J. C. Opazo. 2012. Resolution of the laurasiatherian phylogeny: Evidence from genomic data. Molecular Phylogenetics and Evolution 64:685-689.
Bravo et al.	gustavo_bravo@fas.harvard.edu	Plants	24	22	194	259313	bp	2015	Nicholls, J. A., Pennington, R. T., Koenen, E. J. M., Hughes, C. E., Hearn, J., Bunnefeld, L., Dexter, K. G., Stone, G. N., Kidner, C. A. 2015. Using targeted enrichment of nuclear genes to increase phylogenetic resolution in the neotropical rain forest genus Inga (Leguminosae: Mimosoideae). Front. Plant Sci. 6: 710, doi: 10.3389/fpls.2015.00710.
Bravo et al.	gustavo_bravo@fas.harvard.edu	Stramenopiles	84	84	245	72013	aa	2016	Noguchi, F., G. Tanifuji, M. W. Brown, K. Fujikura, and K. Takishita. 2016. Complex evolution of two types of cardiolipin synthase in the eukaryotic lineage stramenopiles. Molecular Phylogenetics and Evolution 101:133-141.
Bravo et al.	gustavo_bravo@fas.harvard.edu	Ophiuroids	576	576	1484	273000	bp	2017	O'Hara, T. D., A. F. Hugall, B. Thuy, S. Stohr, and A. V. Martynov. 2017. Restructuring higher taxonomy using broad-scale phylogenomics: The living Ophiuroidea. Molecular Phylogenetics and Evolution 107:415-430.
Bravo et al.	gustavo_bravo@fas.harvard.edu	Ophiuroids	185	185	314	246000	bp	2017	O'Hara, T. D., A. F. Hugall, B. Thuy, S. Stohr, and A. V. Martynov. 2017. Restructuring higher taxonomy using broad-scale phylogenomics: The living Ophiuroidea. Molecular Phylogenetics and Evolution 107:415-430.
Bravo et al.	gustavo_bravo@fas.harvard.edu	Echinoderms	576	576	416	273000	bp	2017	O’Hara, T.D., Hugall, A.F., Thuy, B., Stöhr, S. and Martynov, A.V. (2017) Restructuring higher taxonomy using broad-scale phylogenomics: The living Ophiuroidea. Molecular Phylogenetics and Evolution 107:415-430.
Bravo et al.	gustavo_bravo@fas.harvard.edu	Frogs	190	190	66	16500	bp	2015	Peloso, P.L., Frost, D.R., Richards, S.J., Rodrigues, M.T., Donnellan, S., Matsui, M., Raxworthy, C.J., Biju, S.D., Moriarty-Lemmon, E., Lemmon, A.R., Wheeler, W.C., 2015. The impact of anchored phylogenomics and taxon sampling on phylogenetic inference in narrow-mouthed frogs (Anura, Microhylidae). Cladistics. doi: 10.1111/cla.12118.
Bravo et al.	gustavo_bravo@fas.harvard.edu	Cacti	41	5	25	10999	bp	2016	Perez MF, Carstens BC, Rodrigues GL, Moraes EM. 2016. Anonymous nuclear markers reveal taxonomic incongruence and long-term disjunction in a cactus species complex with continental-island distribution in South America. Molecular Phylogenetics and Evolution 95, 11-19.
Bravo et al.	gustavo_bravo@fas.harvard.edu	Hymenoptera	173	173	3256	3011544	bp	2017	Peters, R. S., L. Krogmann, C. Mayer, A. Donath, S. Gunkel, K. Meusemann, A. Kozlov et al. 2017. Evolutionary History of the Hymenoptera. Curr Biol 27:1013-1018.
Bravo et al.	gustavo_bravo@fas.harvard.edu	Eukaryotes	36	36	129	30399	aa	2004	Philippe H, Snell EA, Bapteste E, Lopez P, Holland PWH, Casane D. 2004. Phylogenomics of eukaryotes: Impact of missing data on large alignments. Molecular Biology and Evolution 21, 1740-1752.
Bravo et al.	gustavo_bravo@fas.harvard.edu	Xenoturbella Acoels	66	66	197	38300	aa	2011	Philippe, H., H. Brinkmann, R. R. Copley, L. L. Moroz, H. Nakano, A. J. Poustka, A. Wallberg et al. 2011. Acoelomorph flatworms are deuterostomes related to Xenoturbella. Nature 470:255-258.
Bravo et al.	gustavo_bravo@fas.harvard.edu	Bilateria	35	35	146	35371	aa	2005	Philippe, H., N. Lartillot, and H. Brinkmann. 2005. Multigene analyses of bilaterian animals corroborate the monophyly of Ecdysozoa, Lophotrochozoa, and Protostomia. Molecular Biology and Evolution 22:1246-1253.
Bravo et al.	gustavo_bravo@fas.harvard.edu	Mammals	44	44	NA	1900000	bp	2008	Prasad, A. B., M. W. Allard, E. D. Green, and N. C. S. Program. 2008. Confirming the phylogeny of mammals by use of large comparative sequence data sets. Molecular Biology and Evolution 25:1795-1808.
Bravo et al.	gustavo_bravo@fas.harvard.edu	Birds	198	198	259	394684	bp	2015	Prum, R. O., J. S. Berv, A. Dornburg, D. J. Field, J. P. Townsend, E. M. Lemmon, and A. R. Lemmon. 2015. A comprehensive phylogeny of birds (Aves) using targeted next-generation DNA sequencing. Nature 526:569-573.
Bravo et al.	gustavo_bravo@fas.harvard.edu	Serpentes: Caenophidia	32	32	333	225140	bp	2014	Pyron, R. A. et al. Effectiveness of phylogenomic data and coalescent species-tree methods for resolving difficult nodes in the phylogeny of advanced snakes (Serpentes: Caenophidia). Molecular Phylogenetics and Evolution 81, 221-231, (2014).
Bravo et al.	gustavo_bravo@fas.harvard.edu	Birds	104	104	4165	375000	bp	2016	RG Moyle, CH Oliveros, MJ Andersen, PA Hosner, BW Benz, JD Manthey, SL Travers, RM Brown, BC Faircloth (2016). Tectonic collision and uplift of Wallacea triggered the global songbird radiation. Nat Commun 7:12709. doi: 10.1038/ncomms12709
Bravo et al.	gustavo_bravo@fas.harvard.edu	Bats	37	30	3648	1370000	bp	2017	RN Platt, BC Faircloth, KAM Sullivan, T Kieran, TC Glenn, MW Vandewege, TE Lee, R Baker, RD Stevens, DA Ray (In Press). Conflicting evolutionary histories of the mitochondrial and nuclear genomes in New World Myotis. Syst Biol. doi: 10.1093/sysbio/syx070
Bravo et al.	gustavo_bravo@fas.harvard.edu	Salamandra	8	8	3070	3256500	bp	2017	Rodriguez, A., J. D. Burgon, M. Lyra, I. Irisarri, D. Baurain, L. Blaustein, B. Gocmen et al. 2017. Inferring the shallow phylogeny of true salamanders (Salamandra) by multiple phylogenomic approaches. Molecular Phylogenetics and Evolution 115:16-26.
Bravo et al.	gustavo_bravo@fas.harvard.edu	Mammals	39	39	13111	24000000	bp	2013	Romiguier, J., Ranwez, V., Delsuc, F., Galtier, N. &amp; Douzery, E. J. P. Less Is More in Mammalian Phylogenomics: AT-Rich Genes Minimize Tree Conflicts and Unravel the Root of Placental Mammals. Molecular Biology and Evolution 30, 2134-2144, (2013).
Bravo et al.	gustavo_bravo@fas.harvard.edu	Arthropods	30	30	198	40100	aa	2010	Rota-Stabelli, O., L. Campbell, H. Brinkmann, G. D. Edgecombe, S. J. Longhorn, K. J. Peterson, D. Pisani et al. 2011. A congruent solution to arthropod phylogeny: phylogenomics, microRNAs and morphology support monophyletic Mandibulata. Proceedings of the Royal Society B: Biological Sciences 278:298.
Bravo et al.	gustavo_bravo@fas.harvard.edu	Pancrustacea	80	80	62	21823	bp	2013	Rota-Stabelli, O., Lartillot, N., Philippe, H. & Pisani, D. Serine Codon-Usage Bias in Deep Phylogenomics: Pancrustacean Relationships as a Case Study. Systematic Biology 62, 121-133, doi:10.1093/sysbio/sys077 (2013).
Bravo et al.	gustavo_bravo@fas.harvard.edu	Plants	53	53	308	81546	bp	2016	Sass, C., Iles, W. J. D., Barrett, C. F., Smith, A. Y., and Specht, C. D. (2016). Revisiting the Zingiberales: using multiplexed exon capture to resolve ancient and recent phylogenetic splits in a charasmatic plant lineage. PeerJ 4:e1584 https://doi.org/10.7717/peerj.1584.
Bravo et al.	gustavo_bravo@fas.harvard.edu	Mammals	43	43	7439	NA	bp	2017	Scornavacca, C. & Galtier, N. Incomplete Lineage Sorting in Mammalian Phylogenomics. Systematic Biology 66, 112-120, doi:10.1093/sysbio/syw082 (2017).
Bravo et al.	gustavo_bravo@fas.harvard.edu	Hymenoptera	16	16	24	10917	bp	2010	Sharanowski, B. J. et al. Expressed sequence tags reveal Proctotrupomorpha (minus Chalcidoidea) as sister to Aculeata (Hymenoptera: Insecta). Molecular Phylogenetics and Evolution 57, 101-112
Bravo et al.	gustavo_bravo@fas.harvard.edu	Spiders	17	17	1152	373349	aa	2014	Sharma, P. K., Stefan T., R. P.-P. Alicia, V. L. Gonz, G. Hormiga, W. C. Wheeler, and G. Giribet. 2014. Phylogenomic Interrogation of Arachnida Reveals Systemic Conflicts in Phylogenetic Signal. Molecular Biology and Evolution 31:2963-2984.
Bravo et al.	gustavo_bravo@fas.harvard.edu	Scorpions	38	38	1557	346260	aa	2015	Sharma, P. P., R. Fernández, L. A. Esposito, E. González-Santillán, and L. Monod. 2015. Phylogenomic resolution of scorpions reveals multilevel discordance with morphological phylogenetic signal. Proceedings of the Royal Society B: Biological Sciences 282.
Bravo et al.	gustavo_bravo@fas.harvard.edu	Jawed Vertebrates	19	19	30	27834	bp	2013	Shen, X. X., Liang, D., Feng, Y. J., Chen, M. Y. &amp; Zhang, P. A Versatile and Highly Efficient Toolkit Including 102 Nuclear Markers for Vertebrate Phylogenomics, Tested by Resolving the Higher Level Relationships of the Caudata. Molecular Biology and Evolution 30, 2235-2248, (2013).
Bravo et al.	gustavo_bravo@fas.harvard.edu	Rhizaria	56	56	109	74046	bp	2013	Sierra, R., Matz, M. V., Aglyamova, G., Pillet, L., Decelle, J., Not, F., de Vargas, C., Pawlowski, J. 2013. Deep relationships of Rhizaria revealed by phylogenomics: A farewell to Haeckel's Radiolaria. Molecular Phylogenetics and Evolution 67:53-59
Bravo et al.	gustavo_bravo@fas.harvard.edu	SAR Group	56	56	229	64107	aa	2016	Sierra, R.et al.Evolutionary Origins of Rhizarian Parasites. Molecular Biology and Evolution 33, 980-983, (2016).
Bravo et al.	gustavo_bravo@fas.harvard.edu	Metazoa	97	97	1719	NA	bp	2017	Simion, P., H. Philippe, D. Baurain, M. Jager, D. J. Richter, A. Di Franco, B. Roure et al. 2017. A Large and Consistent Phylogenomic Dataset Supports Sponges as the Sister Group to All Other Animals. Curr Biol 27:958-967.
Bravo et al.	gustavo_bravo@fas.harvard.edu	Insects	8	8	150	42541	aa	2009	Simon, S., Strauss, S., von Haeseler, A. & Hadrys, H. A Phylogenomic Approach to Resolve the Basal Pterygote Divergence. Molecular Biology and Evolution 26, 2719-2730,
Bravo et al.	gustavo_bravo@fas.harvard.edu	Mammals	37	37	447	1385220	bp	2012	Song, S., Liu, L., Edwards, S. V. & Wu, S. Y. Resolving conflict in eutherian mammal phylogeny using phylogenomics and the multispecies coalescent model. Proceedings of the National Academy of Sciences of the United States of America 109, 14942-14947, doi:Doi 10.1073/Pnas.1211733109 (2012).
Bravo et al.	gustavo_bravo@fas.harvard.edu	Plants	9	9	12	NA	bp	2017	Sousa, F., Bertrand, Y.J.K., Doyle, J.J., Oxelman, B. and Pfeil, B.E. (2017) Using genomic location and coalescent simulation to investigate gene tree discordance in Medicago L.. Systematic Biology. https://doi.org/10.1093/sysbio/syx035
Bravo et al.	gustavo_bravo@fas.harvard.edu	Plants	6	6	50	NA	bp	2014	Sousa, F., Bertrand, Y.J.K., Nylinder, S., Oxelman, B., Eriksson, J.S., and Pfeil, B.E. (2014). Phylogenetic properties of 50 nuclear loci in Medicago (Leguminosae) generated using multiplexed sequence capture and next-generation sequencing. PLoS One. 9. doi: 10.1371/journal.pone.0109704
Bravo et al.	gustavo_bravo@fas.harvard.edu	Carnivorous Plant (Genus Sarracenia)	71	11	199	128110	bp	2015	Stephens, J. D. et al. Resolving phylogenetic relationships of the recently radiated carnivorous plant genus Sarracenia using target enrichment. Molecular Phylogenetics and Evolution 85, 76-87, (2015).
Bravo et al.	gustavo_bravo@fas.harvard.edu	Plants	75	16	199	128110	bp	2015	Stephens, J. D., Rogers, W. L. Heyduk, K., Cruse-Sanders, J. M., Determann, R. O., Glenn, T. C., Malmberg, R. L. 2015. Resolving phylogenetic relationships of the recently radiated carnivorous plant genus Sattcenia using target enrichment. Mol. Phylogenet. Evol. 85: 76-87.
Bravo et al.	gustavo_bravo@fas.harvard.edu	Reptiles	44	44	4921	240000	bp	2016	Streicher J.W., Schulte J.A. II, Wiens J.J. 2016. How should genes and taxa be sampled for phylogenomic analyses with missing data? An empirical study in Iguanian lizards. Syst. Biol. 65:128–145
Bravo et al.	gustavo_bravo@fas.harvard.edu	Snakes	34	34	3776	1398192	bp	2016	Streicher, J. W., and J. J. Wiens. 2016. Phylogenomic analyses reveal novel relationships among snake families. Molecular Phylogenetics and Evolution 100:160-169.
Bravo et al.	gustavo_bravo@fas.harvard.edu	Snakes	34	34	3776	1398192	bp	2016	Streicher, J. W., Wiens, J. J. 2016. Phylogenomic analyses reveal novel relationships among snake families. Molecular Phylogenetics and Evolution 100:160-169.
Bravo et al.	gustavo_bravo@fas.harvard.edu	Cephalopods	52	52	180	36156	aa	2017	Tanner, A. R., D. Fuchs, I. E. Winkelmann, M. T. P. Gilbert, M. S. Pankey, Â. M. Ribeiro, K. M. Kocot et al. 2017. Molecular clocks indicate turnover and diversification of modern coleoid cephalopods during the Mesozoic Marine Revolution. Proceedings of the Royal Society B: Biological Sciences 284.
Bravo et al.	gustavo_bravo@fas.harvard.edu	Mammals	36	36	14631	21400000	bp	2016	Tarver, J. E., M. dos Reis, S. Mirarab, R. J. Moran, S. Parker, J. E. O'Reilly, B. L. King et al. 2016. The Interrelationships of Placental Mammals and the Limits of Phylogenetic Inference. Genome Biology and Evolution 8:330-344.
Bravo et al.	gustavo_bravo@fas.harvard.edu	Discosea (Amoeboid)	49	49	550	199347	aa	2016	Tekle, Y. I., Anderson, O.R., Katz, L.A., Maurer-Alcala, X.X., Romero, M.A.C., Molestina, R. 2016. Phylogenomics of 'Discosea': A new molecular phylogenetic perspective on Amoebozoa with flat body forms. Molecular Phylogenetics and Evolution 99:144-154.
Bravo et al.	gustavo_bravo@fas.harvard.edu	Amoeboids	49	49	550	199347	bp	2017	Tekle, Y. I., O. R. Anderson, L. A. Katz, X. X. Maurer-Alcala, M. A. C. Romero, and R. Molestina. 2016. Phylogenomics of 'Discosea': A new molecular phylogenetic perspective on Amoebozoa with flat body forms. Molecular Phylogenetics and Evolution 99:144-154.
Bravo et al.	gustavo_bravo@fas.harvard.edu	Turtles	18	16	11	NA	bp	2008	Thomson, R. C., Shedlock, A. M., Edwards, S. V. and Shaffer, H. B. 2008. Developing markers for multilocus phylogenetics in non-model organisms: A test case with turtles. Molecular Phylogenetics and Evolution 49:514-525.
Bravo et al.	gustavo_bravo@fas.harvard.edu	Iguanian Lizards	76	47	29	23688	bp	2011	Townsend, T. M. et al. Phylogeny of iguanian lizards inferred from 29 nuclear loci, and a comparison of concatenated and species-tree approaches for an ancient, rapid radiation. Molecular Phylogenetics and Evolution 61, 363-380, (2011)
Bravo et al.	gustavo_bravo@fas.harvard.edu	Teiid Lizards	244	244	316	488656	bp	2016	Tucker, D. B., G. R. Colli, L. G. Giugliano, S. B. Hedges, C. R. Hendry, E. M. Lemmon, A. R. Lemmon et al. 2016. Methodological congruence in phylogenomic analyses with morphological support for teiid lizards (Sauria: Teiidae). Molecular Phylogenetics and Evolution 103:75-84.
Bravo et al.	gustavo_bravo@fas.harvard.edu	Fish	45	4	10862	1541113	bp	2017	Unmack, P.J., Sandoval-Castillo, J., Hammer, M.P., Adams, M. and Raadik, T.A. (2017). Genome-wide SNPs resolve a key conflict between sequence and allozyme data to confirm another threatened candidate species of river blackfishes (Teleostei: Percichthyidae: Gadopsis). Molecular Phylogenetics and Evolution 109:415-420.
Bravo et al.	gustavo_bravo@fas.harvard.edu	Pancrustacea	91	46	316	831013	aa	2012	von Reumont, B. M. et al. Pancrustacean Phylogeny in the Light of New Phylogenomic Data: Support for Remipedia as the Possible Sister Group of Hexapoda. Molecular Biology and Evolution 29, 1031-1045, (2012)
Bravo et al.	gustavo_bravo@fas.harvard.edu	Flowers	9	9	1553	1563630	bp	2017	Wang, H. J., W. T. Li, Y. N. Liu, F. S. Yang, and X. Q. Wang. 2017. Resolving interspecific relationships within evolutionarily young lineages using RNA-seq data: An example from Pedicularis section Cyathophora (Orobanchaceae). Molecular Phylogenetics and Evolution 107:345-355.
Bravo et al.	gustavo_bravo@fas.harvard.edu	Plants	9	6	1553	1563630	bp	2017	Wang, H.-J., Li, W.-T., Liu, Y.-N., Yang, F.-S. and Wang, X.-Q. (2017) Resolving interspecific relationships within evolutionarily young lineages using RNA-seq data: An example from Pedicularis section Cyathophora (Orobanchaceae). Molecular Phylogenetics and Evolution 107:345-355.
Bravo et al.	gustavo_bravo@fas.harvard.edu	Acacia Ants	29	29	1672	1321987	bp	2017	Ward, P. S., and M. G. Branstetter. 2017. The acacia ants revisited: convergent evolution and biogeographic context in an iconic ant/plant mutualism. Proceedings of the Royal Society B: Biological Sciences 284.
Bravo et al.	gustavo_bravo@fas.harvard.edu	Poaceae-Andropogoneae (Grasses)	11	10	234	120281	bp	2016	Welker, C. A. D., Souza-Chies, T.T., Longhi-Wagner, H.M., Peichoto, M.C., McKain, M.R., Kellogg, E.A. 2016. Multilocus phylogeny and phylogenomics of Eriochrysis P. Beauv. (Poaceae-Andropogoneae): Taxonomic implications and evidence of interspecific hybridization. Molecular Phylogenetics and Evolution 99:155-167.
Bravo et al.	gustavo_bravo@fas.harvard.edu	Arthropoda	122	122	62	27984	bp	2013	Wheat, C. W. & Wahlberg, N. Phylogenomic Insights into the Cambrian Explosion, the Colonization of Land and the Evolution of Flight in Arthropoda. Systematic Biology 62, 93-109, doi:10.1093/sysbio/sys074 (2013).
Bravo et al.	gustavo_bravo@fas.harvard.edu	Plants	92	92	674	1414611	bp	2014	Wickett, N. J., S. Mirarab, N. Nguyen, T. Warnow, E. Carpenter, N. Matasci, S. Ayyampalayam et al. 2014. Phylotranscriptomic analysis of the origin and early diversification of land plants. Proc Natl Acad Sci U S A 111:E4859-4868.
Bravo et al.	gustavo_bravo@fas.harvard.edu	Bees	10	10	717	69461	aa	2011	Woodard, S. H., B. J. Fischman, A. Venkat, M. E. Hudson, K. Varala, S. A. Cameron, A. G. Clark et al. 2011. Genes involved in convergent evolution of eusociality in bees. Proc Natl Acad Sci U S A 108:7472-7477.
Bravo et al.	gustavo_bravo@fas.harvard.edu	Tapeworms	8	8	3639	2181361	bp	2016	Yuan, H., Jiang, J., Jiminez, F.A., Hoberg, E.P., Cook, J.A., Galbreath, K.E., Li, C. (2016). Target gene enrichment in the cyclophyllidean cestodes, the most diverse group of tapeworms. Molecular Ecology Resources. doi: 10.1111/1755-0998.12532
Bravo et al.	gustavo_bravo@fas.harvard.edu	Gastropoda	40	40	300	15735	aa	2014	Zapata, F., N. G. Wilson, M. Howison, S. C. S. Andrade, K. M. Jörger, M. Schrödl, F. E. Goetz et al. 2014. Phylogenomic analyses of deep gastropod relationships reject Orthogastropoda. Proceedings of the Royal Society B: Biological Sciences 281.
Bravo et al.	gustavo_bravo@fas.harvard.edu	Mammals	24	24	24	NA	bp	2013	Zemann, A., Churakov, G., Donnellan, S., Grützner, F., Zhao, F., Brosius, J., Schmitz, J. 2013. Ancestry of the Australian Termitivorous Numbat. Molecular Biology and Evolution 30:1041-1045.
Bravo et al.	gustavo_bravo@fas.harvard.edu	Vitales (Grapes)	59	59	83	71850	bp	2016	Zhang, N., Wen, J., Zimmer, E. A. 2016. Another look at the phylogenetic position of the grape order Vitales: Chloroplast phylogenomics with an expanded sampling of key lineages. Molecular Phylogenetics and Evolution 101:216-223.
Bravo et al.	gustavo_bravo@fas.harvard.edu	Rosids	63	63	891	1120686	bp	2016	Zhao, L., X. Li, N. Zhang, S. D. Zhang, T. S. Yi, H. Ma, Z. H. Guo et al. 2016. Phylogenomic analyses of large-scale nuclear genes provide new insights into the evolutionary relationships within the rosids. Molecular Phylogenetics and Evolution 105:166-176.
Bravo et al.	gustavo_bravo@fas.harvard.edu	Bacteria (Corynebacteriaceae)	84	84	438	93727	aa	2017	Zhi, X. Y., Z. Jiang, L. L. Yang, and Y. Huang. 2017. The underlying mechanisms of genetic innovation and speciation in the family Corynebacteriaceae: A phylogenomics approach. Molecular Phylogenetics and Evolution 107:246-255.
Bravo et al.	gustavo_bravo@fas.harvard.edu	Bacteria	84	79	438	93727	aa	2017	Zhi, X.-Y., Jiang, Z., Yang, L.-L. and Huang, Y. (2017). The underlying mechanisms of genetic innovation and speciation in the family Corynebacteriaceae: A phylogenomics approach. Molecular Phylogenetics and Evolution 107:246-255.
Bravo et al.	gustavo_bravo@fas.harvard.edu	Mammals	15	15	97	46152	bp	2012	Zhou, X. M. et al. Phylogenomic Analysis Resolves the Interordinal Relationships and Rapid Diversification of the Laurasiatherian Mammals. Systematic Biology 61, 150-164, doi:10.1093/sysbio/syr089
Bravo et al.	gustavo_bravo@fas.harvard.edu	Mammals	15	15	1608	2175102	bp	2012	Zhou, X. M. et al. Phylogenomic Analysis Resolves the Interordinal Relationships and Rapid Diversification of the Laurasiatherian Mammals. Systematic Biology 61, 150-164, doi:10.1093/sysbio/syr089
Bravo et al.	gustavo_bravo@fas.harvard.edu	Cetartiodactyla	24	24	110	1402704	bp	2011	Zhou, X. M., Xu, S. X., Yang, Y. X., Zhou, K. Y. & Yang, G. Phylogenomic analyses and improved resolution of Cetartiodactyla. Molecular Phylogenetics and Evolution 61, 255-264, (2011).
Bravo et al.	gustavo_bravo@fas.harvard.edu	Plants (Oryza)	13	13	69	60821	bp	2013	Zhu, T. et al. Phylogenetic relationships and genome divergence among the AA- genome species of the genus Oryza as revealed by 53 nuclear genes and 16 intergenic regions.
